# Supplementary material for: The Formation of Social Conventions in Real-Time Environments
Source: PubMed Central journal article supplement (PMC4803472; doi:10.1371/journal.pone.0151670), 2016-03-22
Supplement: pone.0151670.s012.pdf [file pone.0151670.s012.pdf]

| Condition |           | # included | # uncompleted | # not paying attention |
|-----------|-----------|------------|---------------|------------------------|
| High      | Dynamic   | 69         | 16            | 8                      |
|           | Ballistic | 56         | 9             | –                      |
| Low       | Dynamic   | 46         | 14            | 4                      |
|           | Ballistic | 52         | 10            | –                      |
