# Supplementary material for: The Formation of Social Conventions in Real-Time Environments
Source: PubMed Central journal article supplement (PMC4803472; doi:10.1371/journal.pone.0151670), 2016-03-22
Supplement: pone.0151670.s013.pdf [file pone.0151670.s013.pdf]

|                |                  | Early peel-off times |        |         | Late peel-off times |        |         |
|----------------|------------------|----------------------|--------|---------|---------------------|--------|---------|
| Interval Range | Kruskal-Wallis P | L mean               | H mean | P value | L mean              | H mean | P value |
| 0.2 ± 0.06     | < .001           | 0.37                 | 0.45   | 0.006   | 0.26                | 0.21   | < .001  |
| 0.2 ± 0.08     | < .001           | 0.38                 | 0.46   | 0.008   | 0.25                | 0.21   | < .001  |
| 0.2 ± 0.10     | < .001           | 0.40                 | 0.48   | 0.023   | 0.25                | 0.21   | < .001  |
| 0.2 ± 0.12     | < .001           | 0.41                 | 0.49   | 0.017   | 0.25                | 0.21   | < .001  |
| 0.2 ± 0.14     | < .001           | 0.40                 | 0.53   | 0.003   | 0.25                | 0.21   | < .001  |
| 0.2 ± 0.16     | < .001           | 0.40                 | 0.55   | 0.005   | 0.25                | 0.21   | < .001  |
